# Supplementary material
Source: Springer Nature journal article supplement (https://www.springermedizin.de/resource/supplementary/13561_2012_41_MOESM1_ESM.pdf/9687286)

Language selection

Medline  
2271 articles

Exclusion

238 articles remove  
- 238 not in English

2033 articles

Title selection

Exclusion

1879 articles remove  
- 801 not dealing with ADRD  
- 941 not dealing with costs  
- 137 global economic evaluation

154 articles

Abstract selection

Exclusion

108 articles remove  
- 16 global economic evaluation  
- 19 methodological or synthesis articles  
- 38 too focused  
- 15 comparison articles  
- 15 correspondence or editorial  
- 5 impact of AD on other disease

46 articles

Papers selection

Exclusion

29 articles remove  
- 6 too focused  
- 2 update  
- 9 not dealing with COI study  
- 1 duplicate  
- 11 not dealing with Alzheimer disease

17 articles

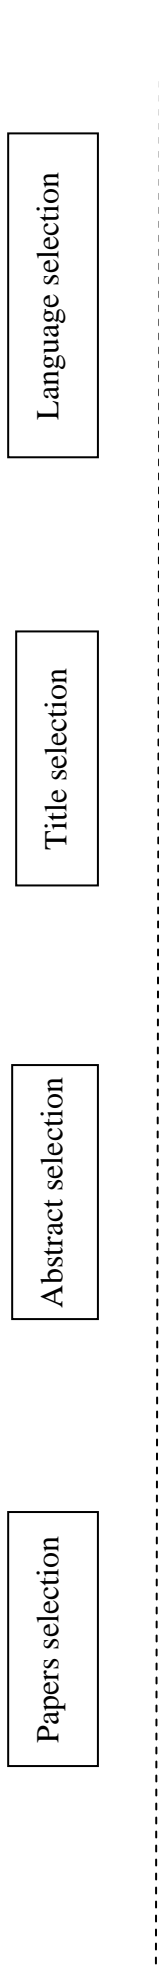

Supplement: MOESM1 [file 9687286]
